# Supplementary material for: Twisted hexaazatrianthrylene: synthesis, optoelectronic properties and near-infrared electroluminescent heterojunctions thereof
Source: Royal Society of Chemistry journal article supplement (doi:10.1039/c5tc01754h), 2015-01-01
Supplement: c5tc01754h1.pdf [file c5tc01754h1.pdf]

## Electronic supplementary information

### Twisted Hexaazatrianthrylene: Synthesis, Optoelectronic Properties and Near-infrared Electroluminescent Heterojunctions Thereof

Diego Cortizo-Lacalle,<sup>a</sup> Antonio Pertegás,<sup>b</sup> Laura Martínez-Sarti,<sup>b</sup> Manuel Melle-Franco,<sup>c</sup> Henk J. Bolink<sup>\*b</sup> and Aurelio Mateo-Alonso<sup>\*a,d</sup>

---

<sup>a</sup> POLYMAT, University of the Basque Country UPV/EHU, Avenida de Tolosa 72, E-20018 Donostia-San Sebastian, Spain. E-mail: [amateo@polymat.eu](mailto:amateo@polymat.eu)

<sup>b</sup> Instituto de Ciencia Molecular, Universidad de Valencia, c/Catedrático J. Beltrán 2, 46980 Paterna, Spain. E-mail: [henk.bolink@uv.es](mailto:henk.bolink@uv.es)

<sup>c</sup> Centro ALGORITMI, 4710-057 Braga, Portugal.

<sup>d</sup> Ikerbasque, Basque Foundation for Science, Bilbao, Spain.

#### Contents

|                                                                             |    |
|-----------------------------------------------------------------------------|----|
| <b>Figure S1.</b> <sup>1</sup> H-NMR of <i>twisted</i> -HATANT              | S2 |
| <b>Figure S2.</b> <sup>13</sup> C-NMR of <i>twisted</i> -HATANT             | S2 |
| <b>Figure S3.</b> MALDI-TOF of <i>twisted</i> -HATANT                       | S3 |
| <b>Figure S4.</b> Absorption and photoluminescence of <i>twisted</i> -HATNA | S3 |
| <b>DFT Calculations</b>                                                     | S4 |

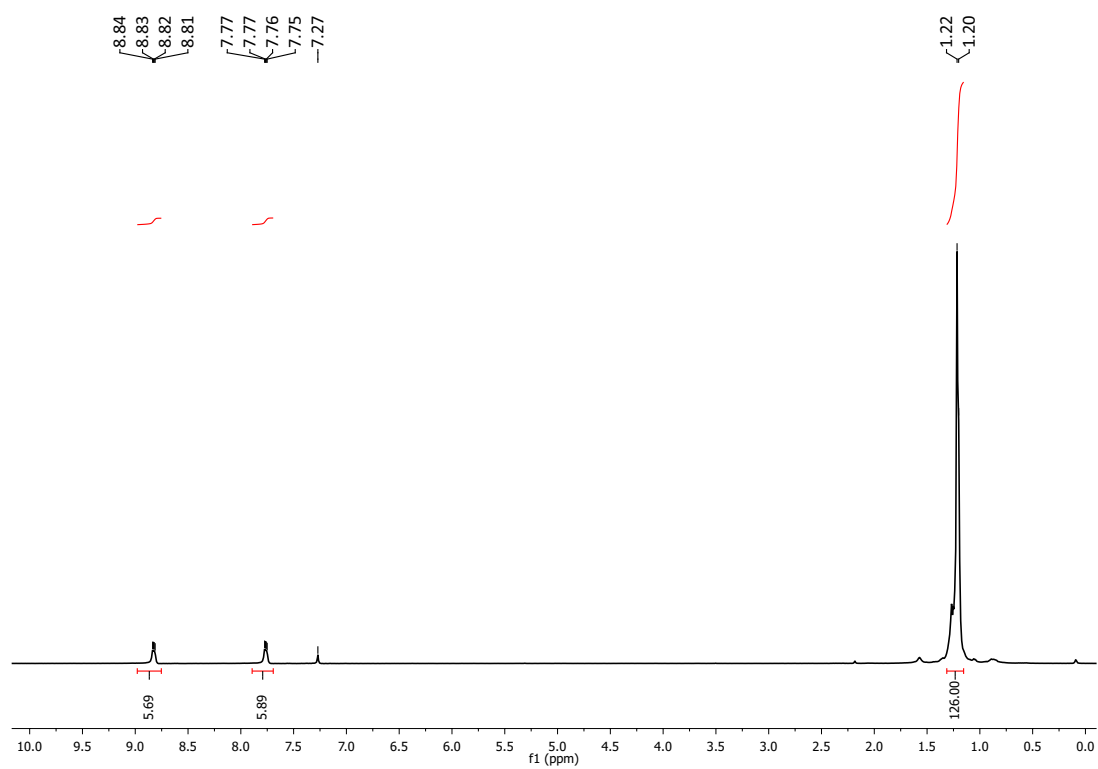

**Figure S1.**  $^1\text{H}$ -NMR of *twisted*-HATANT (400 MHz,  $\text{CDCl}_3$ )

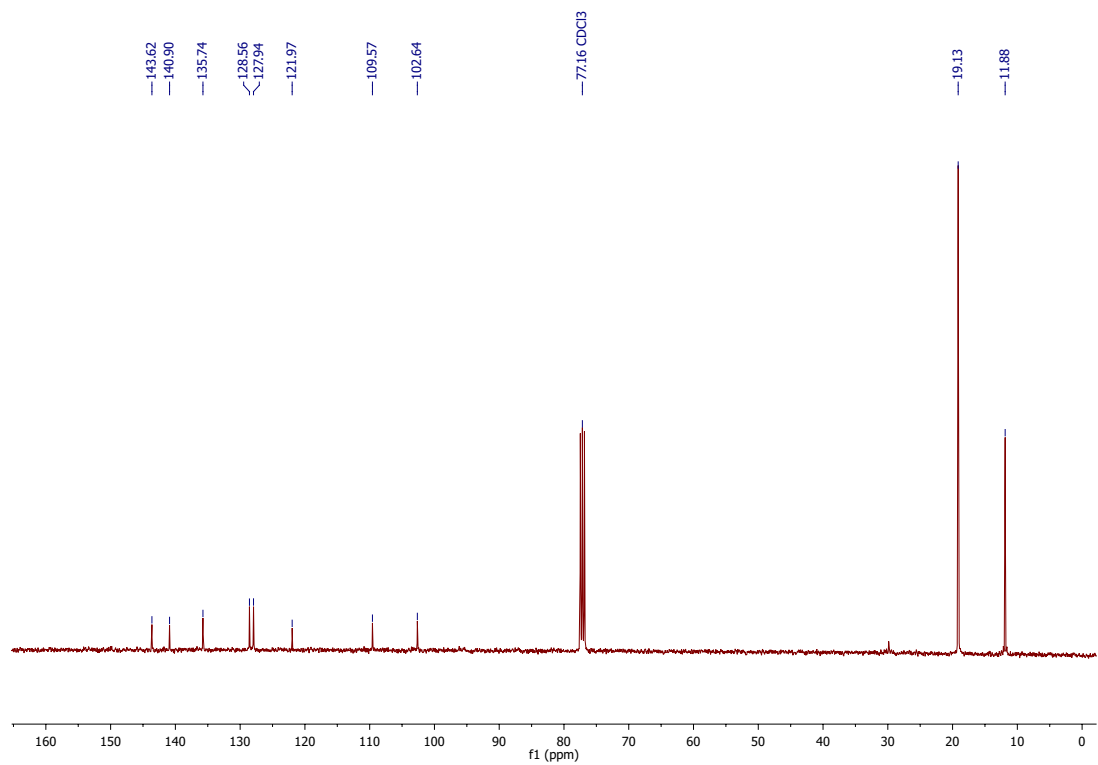

**Figure S2.**  $^{13}\text{C}$ -NMR of *twisted*-HATANT (400 MHz,  $\text{CDCl}_3$ )

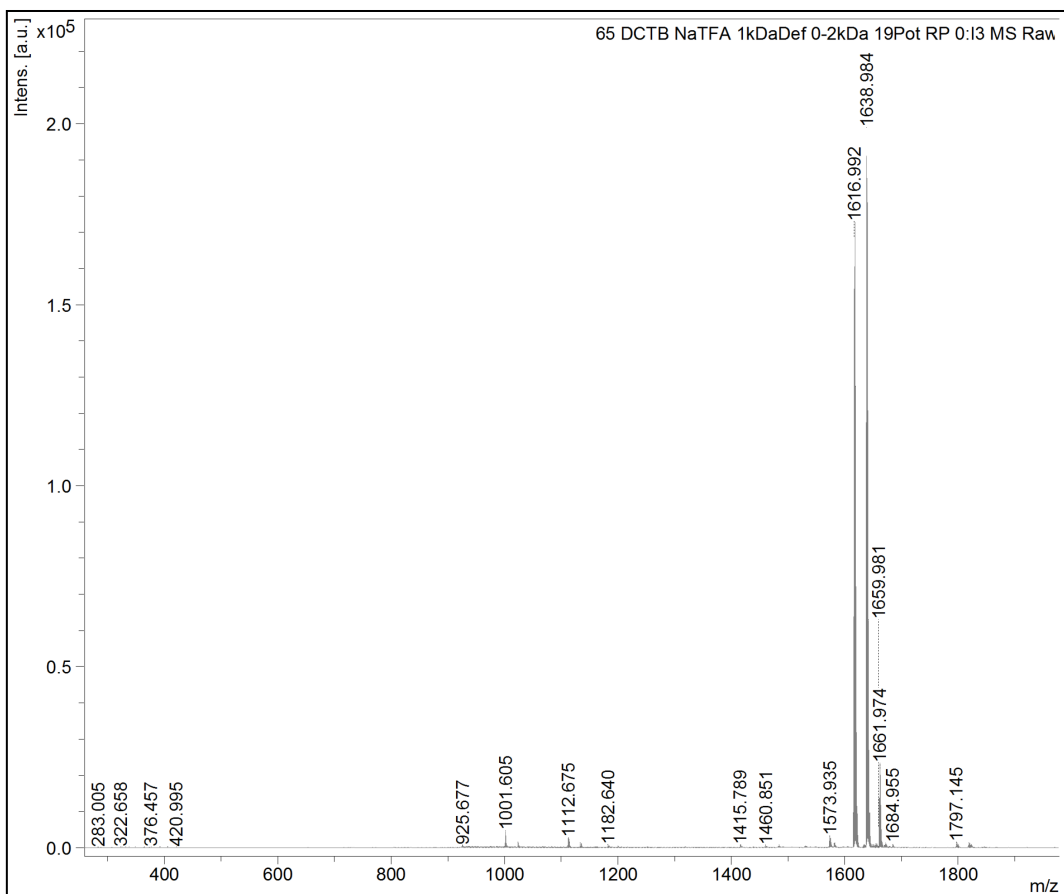

Figure S3. MALDI-TOF *twisted*-HATANT (400 MHz,  $\text{CDCl}_3$ )

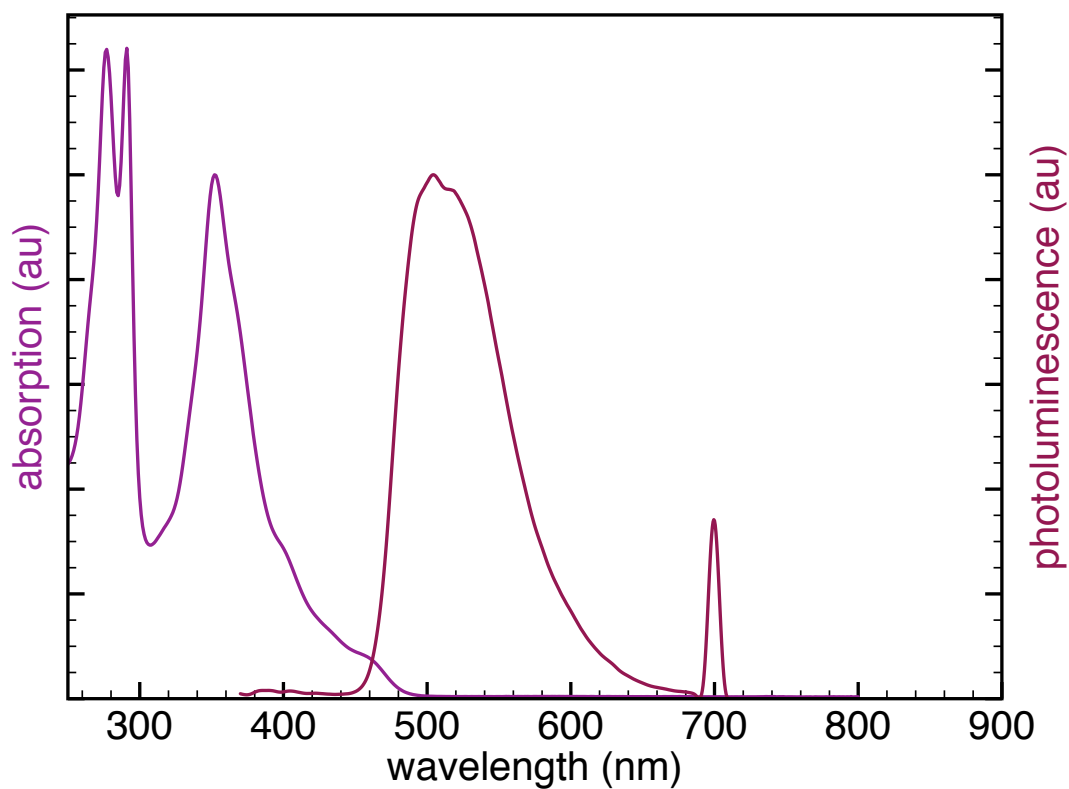

Figure S4. Absorption and photoluminescence of *twisted*-HATNA

## DFT Calculations

DFT geometry optimizations were performed with a B3LYP-6-31g(d,p) Hamiltonian for the *twisted*-HATNA and *twisted*-HATANT molecules. The spectrum and frontier orbitals were computed at the B3LYP-CHCl<sub>3</sub>-6-31g(d,p). All calculation were performed with the program Gaussian 09.

|                        | LUMO+2 | LUMO+1 | LUMO  | HOMO  | HOMO-1 | HOMO-2 | HOMO-LUMO gap |
|------------------------|--------|--------|-------|-------|--------|--------|---------------|
| <i>twisted</i> -HATNA  | -2.71  | -2.72  | -3.08 | -5.92 | -5.96  | -5.97  | 2.8           |
| <i>twisted</i> -HATANT | -2.89  | -2.9   | -3.37 | -5.48 | -5.57  | -5.58  | 2.1           |

**Table 1.** Frontier orbitals for *twisted*-HATNA and *twisted*-HATNA in CHCl<sub>3</sub>. All energies in eV.

### Twisted-HATNA geometry (cartesian coordinates in xyz format):

```
Si  -5.98472  -3.78897  2.58261
N   1.00233  -2.59668  -0.23280
N  -1.73158  -2.15110  0.23370
C  -0.30433  -6.01124  -0.27707
H   0.01894  -7.02159  -0.50330
C   0.57267  -4.95792  -0.51600
C   0.13013  -3.62670  -0.19512
C   0.52348  -1.37779  -0.04149
C   1.83784  -5.17824  -1.12426
C   2.87784  -5.38713  -1.73156
C  -1.58896  -5.80216  0.25716
H  -2.22005  -6.65703  0.47473
C  -2.08377  -4.52434  0.49579
C  -1.23363  -3.40464  0.18808
C  -0.88999  -1.14691  0.04980
C  -3.36501  -4.31959  1.07412
C  -4.43624  -4.15583  1.63898
Si   4.39440  -5.58590  -2.76848
C   4.89492  -3.83695  -3.36190
H   5.77092  -3.98006  -4.01319
C   3.98282  -6.77911  -4.22061
H   4.14616  -7.78468  -3.80435
C   5.75012  -6.33473  -1.63999
H   5.86197  -5.60024  -0.82935
Si   6.33747  -3.14688  2.89174
C   6.21506  -2.53601  4.70801
H   6.81532  -1.61370  4.70221
```

|    |          |          |          |
|----|----------|----------|----------|
| C  | 4.79081  | -2.14291 | 5.14169  |
| H  | 4.31916  | -1.45918 | 4.42928  |
| H  | 4.80685  | -1.64708 | 6.12065  |
| H  | 4.14417  | -3.02177 | 5.23725  |
| C  | 6.85585  | -3.49263 | 5.73280  |
| H  | 6.30421  | -4.43607 | 5.80636  |
| H  | 6.85568  | -3.04198 | 6.73344  |
| H  | 7.89431  | -3.73668 | 5.48577  |
| C  | 5.21479  | -4.61974 | 2.40674  |
| H  | 5.50232  | -4.81821 | 1.36343  |
| C  | 5.49975  | -5.90330 | 3.21110  |
| H  | 6.56108  | -6.17588 | 3.20943  |
| H  | 4.94383  | -6.75192 | 2.79336  |
| H  | 5.18705  | -5.79989 | 4.25619  |
| C  | 3.70850  | -4.29534 | 2.39433  |
| H  | 3.32517  | -4.12099 | 3.40567  |
| H  | 3.14277  | -5.13547 | 1.97321  |
| H  | 3.48184  | -3.41219 | 1.79035  |
| C  | 8.16845  | -3.54352 | 2.48507  |
| H  | 8.44727  | -4.38452 | 3.13830  |
| C  | 8.36958  | -3.99812 | 1.02747  |
| H  | 7.79597  | -4.89997 | 0.79108  |
| H  | 9.42586  | -4.22145 | 0.83040  |
| H  | 8.06423  | -3.21591 | 0.32281  |
| C  | 9.10430  | -2.36448 | 2.81392  |
| H  | 8.84977  | -1.48059 | 2.21779  |
| H  | 10.14782 | -2.62024 | 2.59050  |
| H  | 9.05719  | -2.07600 | 3.86890  |
| N  | 1.76317  | 2.12180  | -0.24471 |
| N  | 2.74008  | -0.45937 | 0.27656  |
| C  | 5.37159  | 2.70350  | -0.24757 |
| H  | 6.08768  | 3.48430  | -0.47998 |
| C  | 4.02506  | 2.92672  | -0.51636 |
| C  | 3.09066  | 1.88330  | -0.18632 |
| C  | 0.94536  | 1.10081  | -0.04563 |
| C  | 3.58974  | 4.11754  | -1.15769 |
| C  | 3.25654  | 5.10823  | -1.79129 |
| C  | 5.82361  | 1.50299  | 0.32997  |
| H  | 6.87422  | 1.39395  | 0.57633  |
| C  | 4.96255  | 0.43938  | 0.57997  |
| C  | 3.57528  | 0.60043  | 0.23288  |
| C  | 1.45260  | -0.23756 | 0.06602  |
| C  | 5.42108  | -0.74508 | 1.21653  |
| C  | 5.82166  | -1.71650 | 1.84075  |
| Si | 2.68163  | 6.49833  | -2.86454 |
| C  | 0.92404  | 6.04436  | -3.46957 |
| H  | 0.61433  | 6.86438  | -4.13566 |
| C  | 0.89508  | 4.73773  | -4.28604 |
| H  | 1.52879  | 4.78612  | -5.17738 |
| H  | -0.12558 | 4.51487  | -4.62210 |

|    |          |          |          |
|----|----------|----------|----------|
| H  | 1.23330  | 3.88920  | -3.68144 |
| C  | -0.08511 | 5.96768  | -2.30711 |
| H  | 0.18372  | 5.18136  | -1.59347 |
| H  | -1.08938 | 5.73637  | -2.68453 |
| H  | -0.15633 | 6.90939  | -1.75343 |
| C  | 3.94090  | 6.70805  | -4.30351 |
| H  | 4.73142  | 7.34906  | -3.88473 |
| C  | 4.61470  | 5.39842  | -4.75518 |
| H  | 5.09773  | 4.87966  | -3.92259 |
| H  | 5.37854  | 5.60058  | -5.51706 |
| H  | 3.89303  | 4.70310  | -5.19773 |
| C  | 3.33993  | 7.45215  | -5.51391 |
| H  | 2.55318  | 6.86229  | -5.99720 |
| H  | 4.11051  | 7.64268  | -6.27160 |
| H  | 2.90433  | 8.41890  | -5.24224 |
| C  | 2.63675  | 8.06693  | -1.76463 |
| H  | 1.94041  | 7.80558  | -0.95472 |
| C  | 2.07242  | 9.30982  | -2.47870 |
| H  | 2.74120  | 9.65264  | -3.27653 |
| H  | 1.96050  | 10.14530 | -1.77607 |
| H  | 1.08951  | 9.12574  | -2.92539 |
| C  | 3.99856  | 8.37734  | -1.11663 |
| H  | 4.39031  | 7.51926  | -0.56140 |
| H  | 3.91628  | 9.21888  | -0.41707 |
| H  | 4.74749  | 8.65785  | -1.86692 |
| Si | -0.41230 | 7.08615  | 2.77940  |
| C  | -0.90147 | 6.74409  | 4.60471  |
| H  | -2.00010 | 6.80421  | 4.58419  |
| C  | -0.53768 | 5.33075  | 5.09620  |
| H  | -0.88639 | 4.55452  | 4.40817  |
| H  | -0.98768 | 5.13412  | 6.07770  |
| H  | 0.54527  | 5.21237  | 5.21019  |
| C  | -0.40308 | 7.81411  | 5.59597  |
| H  | 0.68890  | 7.81011  | 5.68126  |
| H  | -0.80412 | 7.62597  | 6.60003  |
| H  | -0.70721 | 8.82585  | 5.30820  |
| C  | 1.42770  | 6.81754  | 2.32373  |
| H  | 1.47498  | 7.14252  | 1.27364  |
| C  | 2.39611  | 7.71152  | 3.12285  |
| H  | 2.11554  | 8.77040  | 3.09299  |
| H  | 3.41443  | 7.63203  | 2.72232  |
| H  | 2.44248  | 7.41168  | 4.17577  |
| C  | 1.88120  | 5.34520  | 2.35032  |
| H  | 1.89817  | 4.94693  | 3.37065  |
| H  | 2.89817  | 5.25389  | 1.94938  |
| H  | 1.23224  | 4.70317  | 1.74809  |
| C  | -0.96384 | 8.85976  | 2.30485  |
| H  | -0.37726 | 9.53834  | 2.94294  |
| C  | -0.64940 | 9.20979  | 0.83854  |
| H  | 0.42070  | 9.14689  | 0.61696  |

|    |          |          |          |
|----|----------|----------|----------|
| H  | -0.97244 | 10.23192 | 0.60335  |
| H  | -1.17167 | 8.53575  | 0.14967  |
| C  | -2.45491 | 9.10441  | 2.60658  |
| H  | -3.09115 | 8.42788  | 2.02442  |
| H  | -2.74283 | 10.13042 | 2.34455  |
| H  | -2.69696 | 8.95712  | 3.66400  |
| N  | -2.70792 | 0.42317  | -0.22868 |
| N  | -0.95688 | 2.56654  | 0.25540  |
| C  | -5.02321 | 3.25075  | -0.21483 |
| H  | -6.06298 | 3.47423  | -0.42789 |
| C  | -4.54560 | 1.97009  | -0.47382 |
| C  | -3.16664 | 1.69122  | -0.17055 |
| C  | -1.41204 | 0.22898  | -0.04448 |
| C  | -5.37295 | 0.98530  | -1.07820 |
| C  | -6.08259 | 0.19179  | -1.67910 |
| C  | -4.19985 | 4.25329  | 0.32890  |
| H  | -4.62756 | 5.22097  | 0.56772  |
| C  | -2.84336 | 4.04540  | 0.55719  |
| C  | -2.29295 | 2.75877  | 0.22183  |
| C  | -0.50680 | 1.33816  | 0.05550  |
| C  | -2.03921 | 5.04757  | 1.16350  |
| C  | -1.39427 | 5.89605  | 1.76174  |
| Si | -7.03008 | -1.01122 | -2.71427 |
| C  | -5.78028 | -2.32066 | -3.33332 |
| H  | -6.35481 | -3.00111 | -3.98052 |
| C  | -7.87134 | -0.04211 | -4.14721 |
| H  | -8.80995 | 0.33279  | -3.71206 |
| C  | -8.34464 | -1.81186 | -1.57136 |
| H  | -7.75708 | -2.25026 | -0.75144 |
| C  | -8.24705 | -0.95132 | -5.33554 |
| H  | -8.81277 | -0.38850 | -6.08876 |
| H  | -7.35590 | -1.34897 | -5.83378 |
| H  | -8.86329 | -1.80513 | -5.03630 |
| C  | -7.07968 | 1.18572  | -4.63597 |
| H  | -6.85072 | 1.87534  | -3.81889 |
| H  | -6.12802 | 0.89779  | -5.09584 |
| H  | -7.65177 | 1.73664  | -5.39359 |
| C  | -9.13573 | -2.95303 | -2.23867 |
| H  | -9.79351 | -3.44728 | -1.51243 |
| H  | -9.77728 | -2.57907 | -3.04489 |
| H  | -8.48259 | -3.72224 | -2.66437 |
| C  | -5.19132 | -3.14798 | -2.17447 |
| H  | -4.50416 | -3.91316 | -2.55749 |
| H  | -4.62306 | -2.51936 | -1.48055 |
| H  | -5.96326 | -3.66731 | -1.59735 |
| C  | -9.29752 | -0.77514 | -0.94838 |
| H  | -9.92913 | -0.30038 | -1.70871 |
| H  | -9.97142 | -1.24876 | -0.22322 |
| H  | -8.75229 | 0.01774  | -0.42680 |
| C  | 5.31908  | -7.66576 | -0.99694 |

|   |          |          |          |
|---|----------|----------|----------|
| H | 5.19435  | -8.45487 | -1.74817 |
| H | 6.07550  | -8.01914 | -0.28469 |
| H | 4.37188  | -7.56924 | -0.45697 |
| C | 7.12003  | -6.47685 | -2.33019 |
| H | 7.46587  | -5.53601 | -2.77152 |
| H | 7.88514  | -6.80246 | -1.61406 |
| H | 7.09121  | -7.22765 | -3.12825 |
| C | 2.51929  | -6.72011 | -4.69746 |
| H | 2.27487  | -5.74584 | -5.13468 |
| H | 2.33432  | -7.47757 | -5.47002 |
| H | 1.81587  | -6.89459 | -3.87868 |
| C | 4.94719  | -6.61411 | -5.41340 |
| H | 4.75057  | -7.37686 | -6.17743 |
| H | 4.82567  | -5.63771 | -5.89544 |
| H | 5.99845  | -6.70725 | -5.12297 |
| C | -4.64696 | -1.70923 | -4.17983 |
| H | -4.06375 | -0.99020 | -3.59436 |
| H | -3.95637 | -2.49045 | -4.52202 |
| H | -5.02006 | -1.19124 | -5.06920 |
| C | 3.79325  | -3.15535 | -4.19647 |
| H | 2.88098  | -3.01946 | -3.60557 |
| H | 4.11969  | -2.16189 | -4.52934 |
| H | 3.52934  | -3.72884 | -5.09084 |
| C | 5.31480  | -2.92670 | -2.19128 |
| H | 5.62614  | -1.94191 | -2.56243 |
| H | 4.48703  | -2.76424 | -1.49258 |
| H | 6.15462  | -3.33864 | -1.62260 |
| C | -6.24477 | -1.90292 | 2.35570  |
| H | -6.20426 | -1.77858 | 1.26293  |
| C | -7.40134 | -4.79474 | 1.75835  |
| H | -7.66992 | -4.22207 | 0.85722  |
| C | -5.69524 | -4.39041 | 4.38864  |
| H | -5.93159 | -5.46551 | 4.34983  |
| C | -7.60673 | -1.35646 | 2.82440  |
| H | -7.68822 | -0.28780 | 2.58898  |
| H | -8.44670 | -1.85902 | 2.33432  |
| H | -7.74284 | -1.45843 | 3.90623  |
| C | -5.08363 | -1.07122 | 2.93468  |
| H | -4.11852 | -1.39200 | 2.53199  |
| H | -5.20977 | -0.01117 | 2.68135  |
| H | -5.04021 | -1.13936 | 4.02814  |
| C | -6.93764 | -6.19073 | 1.29867  |
| H | -6.63396 | -6.81177 | 2.15061  |
| H | -7.75153 | -6.72190 | 0.78880  |
| H | -6.08793 | -6.13512 | 0.61300  |
| C | -8.66950 | -4.92375 | 2.62550  |
| H | -8.47628 | -5.51799 | 3.52597  |
| H | -9.06700 | -3.95635 | 2.94684  |
| H | -9.46529 | -5.43610 | 2.07007  |
| C | -6.64741 | -3.74751 | 5.41786  |



|   |          |          |         |
|---|----------|----------|---------|
| H | -7.70155 | -3.84396 | 5.14157 |
| H | -6.52256 | -4.21737 | 6.40179 |
| H | -6.43421 | -2.68043 | 5.54394 |
| C | -4.23561 | -4.26329 | 4.86583 |
| H | -4.11974 | -4.69673 | 5.86758 |
| H | -3.53906 | -4.77248 | 4.19481 |
| H | -3.92287 | -3.21514 | 4.92811 |

***Twisted-HATANT* geometry (cartesian coordinates in xyz format):**

|    |          |          |          |
|----|----------|----------|----------|
| Si | 5.71683  | -3.93822 | -2.63888 |
| N  | -1.14515 | -2.52811 | 0.24798  |
| N  | 1.60858  | -2.23561 | -0.24931 |
| C  | -0.04363 | -6.04656 | 0.27332  |
| C  | -0.84532 | -4.89831 | 0.52542  |
| C  | -0.33054 | -3.61598 | 0.20153  |
| C  | -0.60298 | -1.34500 | 0.05127  |
| C  | -2.11719 | -5.01193 | 1.14408  |
| C  | -3.16840 | -5.12553 | 1.75966  |
| C  | 1.27270  | -5.90463 | -0.30023 |
| C  | 1.81892  | -4.61197 | -0.53092 |
| C  | 1.04104  | -3.46978 | -0.20746 |
| C  | 0.83084  | -1.19289 | -0.05155 |
| C  | 3.10100  | -4.44375 | -1.11461 |
| C  | 4.17467  | -4.30295 | -1.68361 |
| Si | -4.69107 | -5.16914 | 2.80614  |
| C  | -5.03941 | -3.37310 | 3.36528  |
| C  | -4.37291 | -6.36353 | 4.28102  |
| C  | -6.11048 | -5.82323 | 1.69636  |
| Si | -6.32702 | -2.79092 | -2.94539 |
| C  | -6.12457 | -2.16159 | -4.74850 |
| C  | -4.68556 | -1.75555 | -5.11704 |
| C  | -6.71502 | -3.11017 | -5.81044 |
| C  | -5.25422 | -4.29098 | -2.43165 |
| C  | -5.55635 | -5.56997 | -3.23715 |
| C  | -3.74080 | -4.00569 | -2.39163 |
| C  | -8.17932 | -3.16732 | -2.62146 |
| C  | -8.45138 | -3.60770 | -1.17099 |
| C  | -9.09679 | -1.99158 | -3.00698 |
| N  | -1.63112 | 2.21945  | 0.28722  |
| N  | -2.75745 | -0.29751 | -0.26977 |
| C  | -5.22569 | 3.03014  | 0.32977  |
| C  | -3.83187 | 3.13869  | 0.59207  |
| C  | -2.98046 | 2.06046  | 0.23692  |
| C  | -0.87916 | 1.16255  | 0.06635  |
| C  | -3.29115 | 4.27583  | 1.24598  |
| C  | -2.85454 | 5.22180  | 1.88734  |
| C  | -5.75835 | 1.84370  | -0.29528 |
| C  | -4.91252 | 0.73146  | -0.56359 |

|    |          |          |          |
|----|----------|----------|----------|
| C  | -3.53932 | 0.81361  | -0.21388 |
| C  | -1.46675 | -0.15290 | -0.05671 |
| C  | -5.40483 | -0.42648 | -1.21966 |
| C  | -5.82486 | -1.38036 | -1.86052 |
| Si | -2.10149 | 6.52547  | 2.95911  |
| C  | -0.37060 | 5.89463  | 3.47489  |
| C  | -0.43011 | 4.56295  | 4.24813  |
| C  | 0.58256  | 5.76791  | 2.27050  |
| C  | -3.26567 | 6.82147  | 4.46235  |
| C  | -4.04903 | 5.57526  | 4.91681  |
| C  | -2.53331 | 7.46446  | 5.65831  |
| C  | -1.95638 | 8.11022  | 1.89074  |
| C  | -1.25257 | 9.27759  | 2.60849  |
| C  | -3.30794 | 8.56052  | 1.30674  |
| Si | 0.65794  | 6.90211  | -2.85385 |
| C  | 1.06687  | 6.46159  | -4.67799 |
| C  | 0.69311  | 5.02222  | -5.07777 |
| C  | 0.51945  | 7.47439  | -5.70295 |
| C  | -1.16701 | 6.70465  | -2.31014 |
| C  | -2.14052 | 7.62282  | -3.07510 |
| C  | -1.67119 | 5.24893  | -2.29873 |
| C  | 1.26148  | 8.68644  | -2.49360 |
| C  | 1.04756  | 9.10146  | -1.02600 |
| C  | 2.72901  | 8.90788  | -2.90601 |
| N  | 2.72702  | 0.27267  | 0.24140  |
| N  | 1.09836  | 2.50996  | -0.26972 |
| C  | 5.23298  | 2.97395  | 0.21644  |
| C  | 4.63566  | 1.71192  | 0.48788  |
| C  | 3.26413  | 1.51971  | 0.17728  |
| C  | 1.43054  | 0.15161  | 0.05153  |
| C  | 5.36907  | 0.66905  | 1.11107  |
| C  | 5.99060  | -0.18396 | 1.73022  |
| C  | 4.45327  | 4.03690  | -0.37015 |
| C  | 3.05877  | 3.86540  | -0.59540 |
| C  | 2.45260  | 2.63142  | -0.24244 |
| C  | 0.58360  | 1.31782  | -0.05469 |
| C  | 2.28401  | 4.88129  | -1.21307 |
| C  | 1.65243  | 5.73538  | -1.82016 |
| Si | 6.76555  | -1.48331 | 2.79283  |
| C  | 5.34454  | -2.58059 | 3.45348  |
| C  | 7.75410  | -0.60720 | 4.19117  |
| C  | 7.93492  | -2.49781 | 1.66202  |
| C  | 8.02823  | -1.53610 | 5.39202  |
| C  | 7.14203  | 0.72401  | 4.66725  |
| C  | 8.53671  | -3.74247 | 2.34164  |
| C  | 4.61826  | -3.32577 | 2.31643  |
| C  | 9.03788  | -1.63554 | 1.02128  |
| C  | -5.80142 | -7.20248 | 1.08584  |
| C  | -7.48705 | -5.82527 | 2.38796  |
| C  | -2.90963 | -6.40808 | 4.76059  |

|   |           |          |          |
|---|-----------|----------|----------|
| C | -5.32224  | -6.10260 | 5.46879  |
| C | 4.33104   | -1.79450 | 4.30737  |
| C | -3.87750  | -2.76739 | 4.17636  |
| C | -5.39405  | -2.45629 | 2.17833  |
| C | 6.01740   | -2.06552 | -2.36129 |
| C | 7.12891   | -4.99341 | -1.86936 |
| C | 5.38945   | -4.48164 | -4.45741 |
| C | 7.38622   | -1.53472 | -2.82853 |
| C | 4.86832   | -1.19449 | -2.90538 |
| C | 6.64596   | -6.38728 | -1.42386 |
| C | 8.37144   | -5.13284 | -2.77131 |
| C | 6.33643   | -3.82348 | -5.48183 |
| C | 3.92509   | -4.31657 | -4.90785 |
| C | -6.12015  | 4.09689  | 0.64169  |
| C | -7.15105  | 1.80239  | -0.60128 |
| C | -7.97597  | 2.85277  | -0.29306 |
| C | -7.45454  | 4.01350  | 0.33955  |
| C | 5.10565   | 5.26615  | -0.68380 |
| C | 6.61487   | 3.20852  | 0.48250  |
| C | 7.20188   | 4.40809  | 0.17385  |
| C | 6.43810   | 5.44917  | -0.41955 |
| C | 2.01985   | -7.08380 | -0.59437 |
| C | -0.52784  | -7.35983 | 0.54951  |
| C | 1.51422   | -8.32845 | -0.32225 |
| C | 0.22563   | -8.46792 | 0.26051  |
| H | -5.91788  | -3.43013 | 4.02649  |
| H | -4.61260  | -7.36151 | 3.88362  |
| H | -6.15723  | -5.10127 | 0.86828  |
| H | -6.72948  | -1.24227 | -4.75911 |
| H | -4.24792  | -1.07926 | -4.37655 |
| H | -4.03008  | -2.62925 | -5.19796 |
| H | -4.66441  | -1.24635 | -6.08902 |
| H | -7.76008  | -3.36780 | -5.60879 |
| H | -6.15121  | -4.04709 | -5.87404 |
| H | -6.67921  | -2.64623 | -6.80434 |
| H | -5.56693  | -4.47788 | -1.39332 |
| H | -5.02674  | -6.42950 | -2.80775 |
| H | -6.62347  | -5.81823 | -3.25180 |
| H | -5.22434  | -5.47753 | -4.27724 |
| H | -3.20513  | -4.86061 | -1.96135 |
| H | -3.50219  | -3.12943 | -1.78239 |
| H | -3.33506  | -3.84204 | -3.39598 |
| H | -8.43004  | -4.01376 | -3.27911 |
| H | -7.89125  | -4.50793 | -0.89905 |
| H | -8.17793  | -2.81959 | -0.45979 |
| H | -9.51633  | -3.82746 | -1.02232 |
| H | -10.15046 | -2.24562 | -2.83508 |
| H | -8.87536  | -1.10257 | -2.40476 |
| H | -8.99562  | -1.70987 | -4.05986 |
| H | 0.03678   | 6.66008  | 4.15335  |

|   |          |          |          |
|---|----------|----------|----------|
| H | -0.86223 | 3.76921  | 3.62923  |
| H | -1.02687 | 4.63531  | 5.16312  |
| H | 0.57759  | 4.24041  | 4.53934  |
| H | 1.57595  | 5.43774  | 2.60000  |
| H | 0.71640  | 6.71709  | 1.74155  |
| H | 0.21820  | 5.03129  | 1.54648  |
| H | -4.00432 | 7.55229  | 4.09960  |
| H | -4.74934 | 5.83226  | 5.72200  |
| H | -3.38246 | 4.79707  | 5.30440  |
| H | -4.62387 | 5.13205  | 4.09898  |
| H | -3.24290 | 7.71279  | 6.45769  |
| H | -1.79123 | 6.78220  | 6.08770  |
| H | -2.01128 | 8.38766  | 5.38745  |
| H | -1.31926 | 7.80772  | 1.04716  |
| H | -0.27423 | 8.99280  | 3.01008  |
| H | -1.85527 | 9.65902  | 3.44081  |
| H | -1.09145 | 10.11721 | 1.92054  |
| H | -3.79556 | 7.75807  | 0.74414  |
| H | -4.00002 | 8.88391  | 2.09357  |
| H | -3.17669 | 9.41216  | 0.62710  |
| H | 2.16504  | 6.52785  | -4.70793 |
| H | 1.07432  | 4.28603  | -4.36367 |
| H | -0.39256 | 4.89252  | -5.14143 |
| H | 1.10505  | 4.77562  | -6.06468 |
| H | 0.82250  | 8.50282  | -5.48011 |
| H | -0.57485 | 7.45531  | -5.74549 |
| H | 0.88376  | 7.23797  | -6.71080 |
| H | -1.15503 | 7.04193  | -1.26280 |
| H | -3.14148 | 7.58042  | -2.62799 |
| H | -1.82478 | 8.67206  | -3.06961 |
| H | -2.24492 | 7.31470  | -4.12141 |
| H | -2.67271 | 5.19801  | -1.85451 |
| H | -1.02011 | 4.59186  | -1.71539 |
| H | -1.74573 | 4.84060  | -3.31255 |
| H | 0.63788  | 9.34302  | -3.11962 |
| H | -0.00567 | 9.05568  | -0.73151 |
| H | 1.61074  | 8.45301  | -0.34481 |
| H | 1.39034  | 10.13022 | -0.85667 |
| H | 3.03674  | 9.94363  | -2.71412 |
| H | 3.40296  | 8.25861  | -2.33479 |
| H | 2.89981  | 8.70709  | -3.96838 |
| H | 5.82193  | -3.33044 | 4.10317  |
| H | 8.72590  | -0.36878 | 3.73313  |
| H | 7.28010  | -2.84750 | 0.85055  |
| H | 8.67521  | -1.03875 | 6.12565  |
| H | 7.10143  | -1.80509 | 5.91090  |
| H | 8.52274  | -2.46825 | 5.10076  |
| H | 7.79895  | 1.20985  | 5.40018  |
| H | 6.17190  | 0.57353  | 5.15303  |
| H | 6.98590  | 1.42206  | 3.84012  |

|   |          |          |          |
|---|----------|----------|----------|
| H | 7.77086  | -4.39110 | 2.77973  |
| H | 9.23507  | -3.46680 | 3.14014  |
| H | 9.10183  | -4.34513 | 1.61921  |
| H | 3.82881  | -3.97063 | 2.72312  |
| H | 5.29170  | -3.96605 | 1.73766  |
| H | 4.14327  | -2.62814 | 1.61836  |
| H | 8.62389  | -0.77356 | 0.48849  |
| H | 9.74140  | -1.25704 | 1.77244  |
| H | 9.62410  | -2.22103 | 0.30152  |
| H | -4.85216 | -7.20251 | 0.54073  |
| H | -5.74338 | -7.98094 | 1.85611  |
| H | -6.58888 | -7.50551 | 0.38406  |
| H | -7.74575 | -4.84721 | 2.80740  |
| H | -7.52607 | -6.55728 | 3.20287  |
| H | -8.27891 | -6.09606 | 1.67813  |
| H | -2.78404 | -7.16451 | 5.54599  |
| H | -2.59255 | -5.44823 | 5.18266  |
| H | -2.21928 | -6.64871 | 3.94747  |
| H | -5.18369 | -6.86258 | 6.24817  |
| H | -5.12716 | -5.12873 | 5.93140  |
| H | -6.37758 | -6.12188 | 5.17886  |
| H | 3.53649  | -2.45822 | 4.67124  |
| H | 4.79337  | -1.32809 | 5.18320  |
| H | 3.85290  | -1.00285 | 3.72039  |
| H | -2.96270 | -2.72001 | 3.57578  |
| H | -3.65365 | -3.34136 | 5.08134  |
| H | -4.11808 | -1.74349 | 4.48943  |
| H | -5.62081 | -1.44200 | 2.53070  |
| H | -6.26992 | -2.80953 | 1.62457  |
| H | -4.56208 | -2.37659 | 1.47048  |
| H | 5.98996  | -1.97047 | -1.26528 |
| H | 7.43357  | -4.44501 | -0.96494 |
| H | 5.60827  | -5.56123 | -4.45481 |
| H | 7.49190  | -0.47503 | -2.56398 |
| H | 8.22031  | -2.06808 | -2.36137 |
| H | 7.50948  | -1.60840 | -3.91423 |
| H | 5.02107  | -0.14441 | -2.62686 |
| H | 3.90146  | -1.50415 | -2.49837 |
| H | 4.81078  | -1.23372 | -3.99963 |
| H | 7.46278  | -6.95043 | -0.95452 |
| H | 5.82398  | -6.32443 | -0.70542 |
| H | 6.29620  | -6.98193 | -2.27717 |
| H | 9.16964  | -5.67330 | -2.24680 |
| H | 8.78162  | -4.16766 | -3.08325 |
| H | 8.14254  | -5.70398 | -3.67827 |
| H | 7.39298  | -3.94811 | -5.22704 |
| H | 6.18630  | -4.25918 | -6.47790 |
| H | 6.14131  | -2.74922 | -5.57004 |
| H | 3.23025  | -4.83460 | -4.24187 |
| H | 3.78720  | -4.71758 | -5.92026 |

|   |          |          |          |
|---|----------|----------|----------|
| H | 3.62881  | -3.26217 | -4.93371 |
| H | -5.71240 | 4.98275  | 1.11559  |
| H | -7.54229 | 0.91009  | -1.07683 |
| H | -9.03423 | 2.79890  | -0.53002 |
| H | -8.11795 | 4.83852  | 0.58081  |
| H | 4.51428  | 6.05778  | -1.12984 |
| H | 7.19266  | 2.40545  | 0.92609  |
| H | 8.25636  | 4.56493  | 0.37988  |
| H | 6.91419  | 6.39448  | -0.66181 |
| H | 3.00398  | -6.96792 | -1.03453 |
| H | -1.51588 | -7.45861 | 0.98481  |
| H | 2.10011  | -9.21376 | -0.55011 |
| H | -0.16370 | -9.45889 | 0.47361  |
